# Supplementary material for: Deep-sea mystery solved: astonishing larval transformations and extreme sexual dimorphism unite three fish families
Source: PubMed Central journal article supplement (PMC2667197; doi:10.1098/rsbl.2008.0722), 2009-01-20

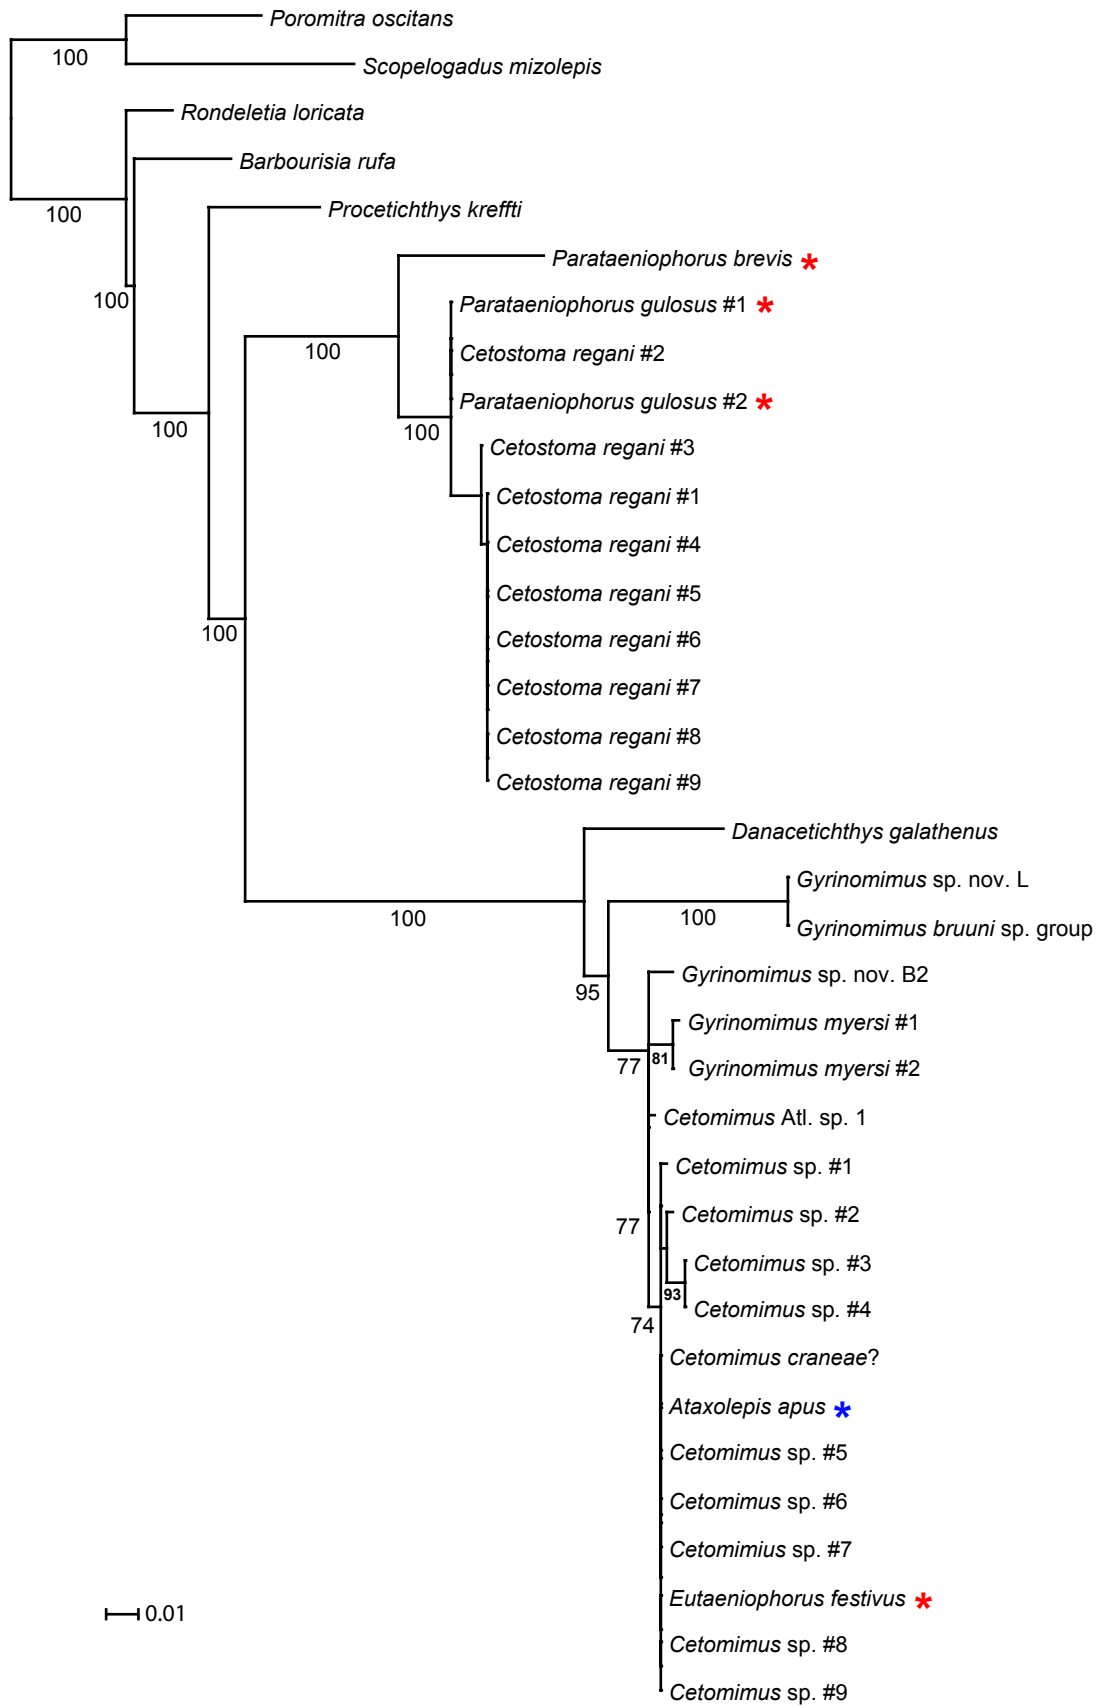

Supplement: rsbl20080722s15.pdf [file rsbl20080722s15.pdf]
